# Supplementary material for: How stereochemistry affects the physicochemical features of gemini surfactant based cationic liposomes
Source: Royal Society of Chemistry journal article supplement (doi:10.1039/c2sm25193k), 2012-01-01
Supplement: c2sm25193k.pdf [file c2sm25193k.pdf]

# How stereochemistry affects the physicochemical features of gemini surfactant based cationic liposomes

**Simone Aleandri,<sup>a</sup> Maria Grazia Bonicelli,<sup>b</sup> Federico Bordi,<sup>c,d</sup> Stefano Casciari,<sup>e</sup> Marco Diociaiuti,<sup>f</sup> Luisa Giansanti,<sup>\*g</sup> Francesca Leonelli,<sup>a</sup> Giovanna Mancini,<sup>g</sup> Giuseppe Perrone<sup>b</sup> and Simona Sennato<sup>\*c,d</sup>**

<sup>a</sup>Dipartimento di Chimica Università degli Studi di Roma "Sapienza", P.le A. Moro 5, 00185 Roma (Italy). Tel: +390649913681. E-mail: [simone.aleandri@uniroma1.it](mailto:simone.aleandri@uniroma1.it). Tel: +390649913681. E-mail: [simone.aleandri@uniroma1.it](mailto:simone.aleandri@uniroma1.it). Tel: +390649913197; [francesca.leonelli@uniroma1.it](mailto:francesca.leonelli@uniroma1.it)

<sup>b</sup>Dipartimento di Ingegneria chimica, materiali, ambiente Università degli Studi di Roma "Sapienza", P.le A. Moro 5, 00185 Roma (Italy). Tel: +390649766732. E-mail: [mariagrazia.bonicelli@uniroma1.it](mailto:mariagrazia.bonicelli@uniroma1.it). E-mail: [perrone.peppe@tiscali.it](mailto:perrone.peppe@tiscali.it)

<sup>c</sup>Dipartimento di Fisica, Università degli Studi di Roma "Sapienza", P.le A. Moro 5, 00185 Roma Italy; <sup>d</sup>CNR-IPCF, Università degli Studi di Roma "Sapienza", P.le A. Moro 5, 00185 Roma, Italy. Tel: +390649913439. E-mail: [federico.bordi@roma1.infn.it](mailto:federico.bordi@roma1.infn.it). Tel: +390649913469. E-mail: [simona.sennato@roma1.infn.it](mailto:simona.sennato@roma1.infn.it).

<sup>e</sup>Dipartimento di Igiene del Lavoro, INAIL ex-ISPEL, 00040 Monteporzio Catone Italy <sup>f</sup>Dipartimento di Tecnologie e Salute, Istituto Superiore di Sanità, V.le Regina Elena 299, 00161, Roma (Italy)

<sup>f</sup>Dipartimento di Tecnologie e Salute Istituto Superiore di Sanità, Viale Regina Elena 299, 00161 Roma Italy. Tel: +390649902981; E-mail: [marco.diociaiuti@iss.it](mailto:marco.diociaiuti@iss.it).

<sup>g</sup>CNR, Istituto di Metodologie Chimiche and Dipartimento di Chimica Università degli Studi di Roma "Sapienza", P.le A. Moro 5, 00185 Roma (Italy). Fax: +3906490421; Tel: +390649913078. E-mail: [giovanna.mancini@uniroma1.it](mailto:giovanna.mancini@uniroma1.it). Tel: +0390649913681; E-mail: [luisa.giansanti@uniroma1.it](mailto:luisa.giansanti@uniroma1.it).

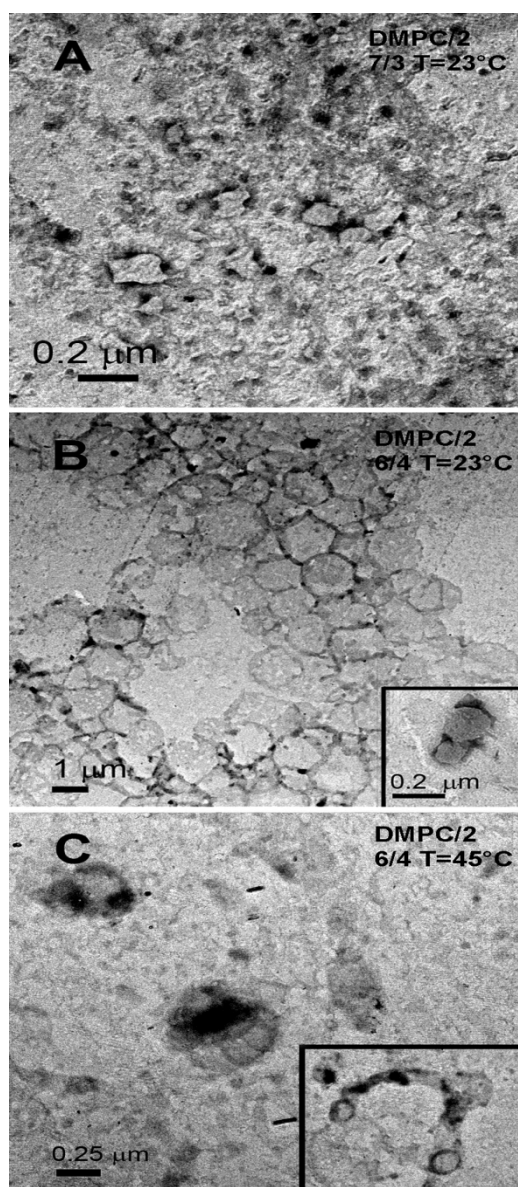

**Figure 1S.** TEM images of DMPC/2 formulations at different molar ratios and at different temperatures. A: 7/3 at 23 °C, B: 6/4 at 25 °C, C: 6/4 at 45 °C. In the inset, where not indicated, the bar length is like the one of the main panel. Panel A shows small particles observed at 7/3 molar ratio, with an average diameter of the order of ~100 nm or less, in accordance with DLS findings. Note that since in DLS measurements the size is obtained as an “intensity average”, and hence rather strongly biased to larger and higher scattering particles (the scattered light intensity is proportional to the squared volume of a particle), the DLS estimate roughly corresponds to the size of the largest particles observable in these images. At higher gemini content, and low temperature, large aggregates are visible (panel B, DMPC/2 6/4, T=23 °C) that are clearly the result of the aggregation of smaller particles (panel B and inset). As the temperature is increased, the large aggregates almost disappear and only the individual particles are clearly visible (panel C, DMPC/2 6/4, T=45 °C).
